# Supplementary figures and images for: Use of antimicrobial dressings in England and the association with published clinical guidance: interrupted time series analysis
Source: PubMed Central journal article supplement — BMJ Open. 2019 Sep 17;9(9):e028727. doi: 10.1136/bmjopen-2018-028727 (PMC6756320; doi:10.1136/bmjopen-2018-028727), 2019-09-17

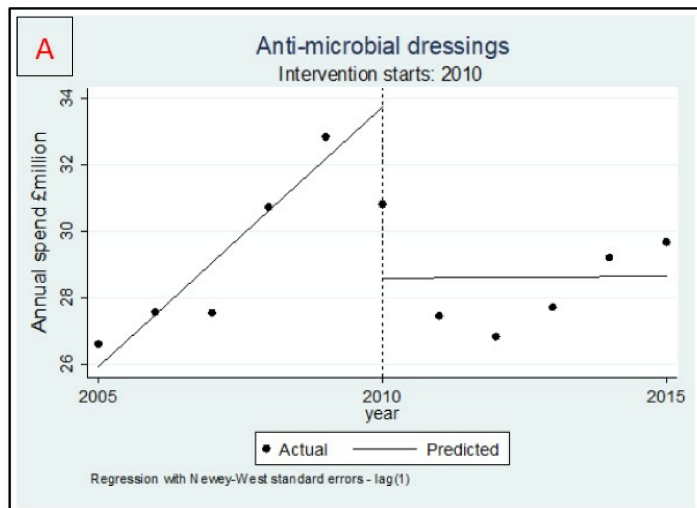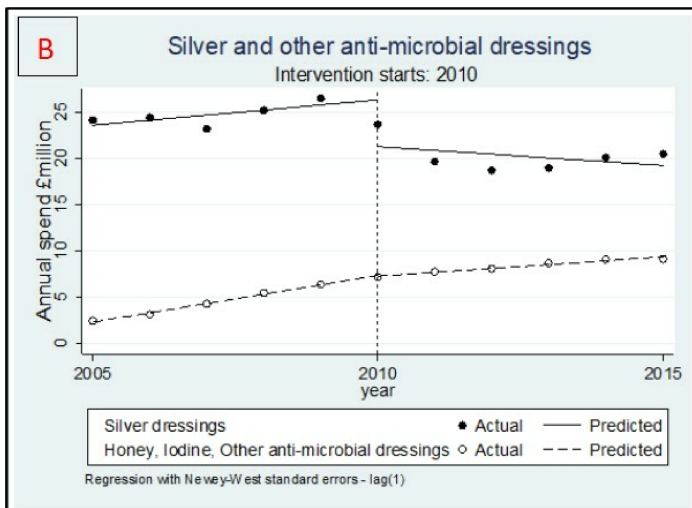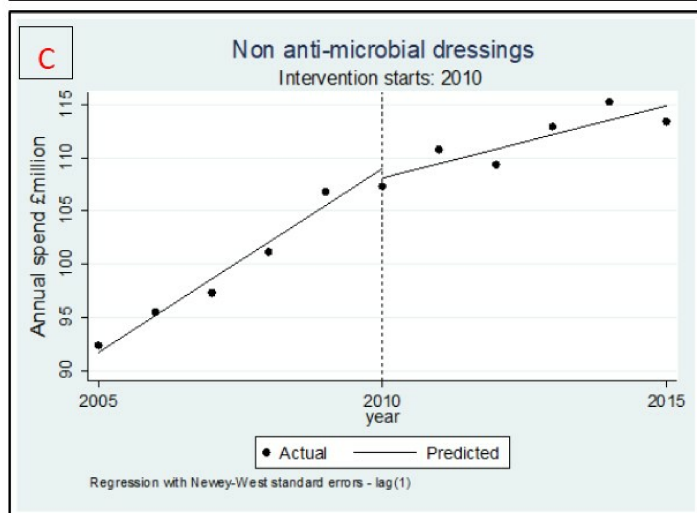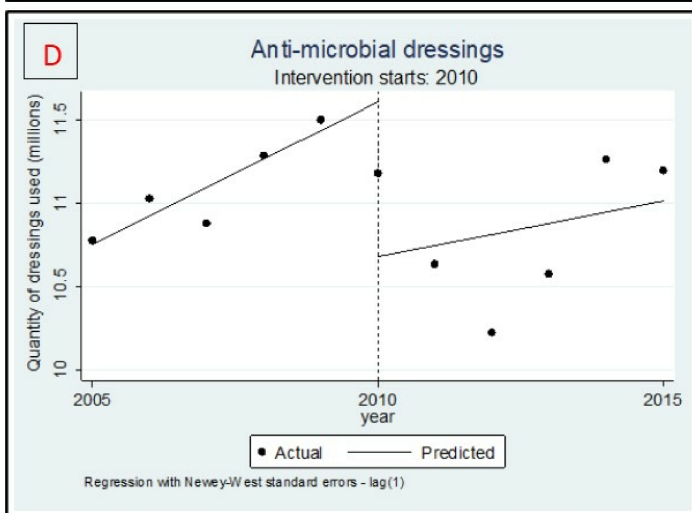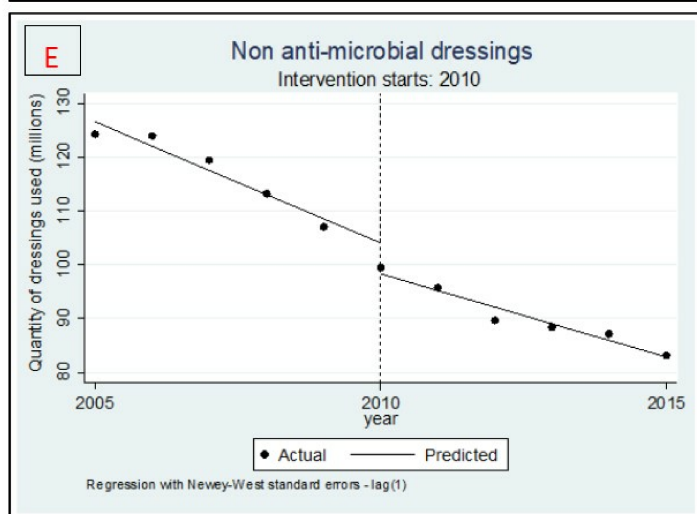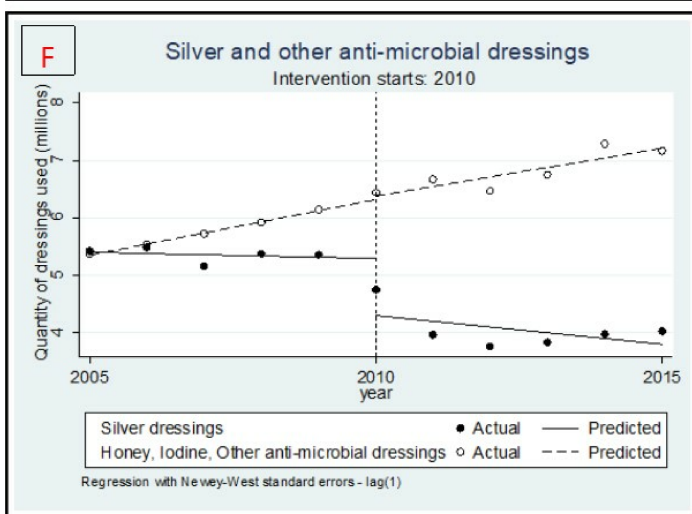

Supplement: bmjopen-2018-028727supp001.pdf [file bmjopen-2018-028727supp001.pdf]
